# Supplementary material for: Prognostic value of characteristics of plaque combined with residual syntax score among patients with STEMI undergoing primary PCI: an intravascular optical coherence tomography study
Source: PubMed Central journal article supplement (PMC8588603; doi:10.1186/s12959-021-00329-z), 2021-11-12
Supplement: 12959_2021_329_MOESM1_ESM.pdf [file 12959_2021_329_MOESM1_ESM.pdf]

A

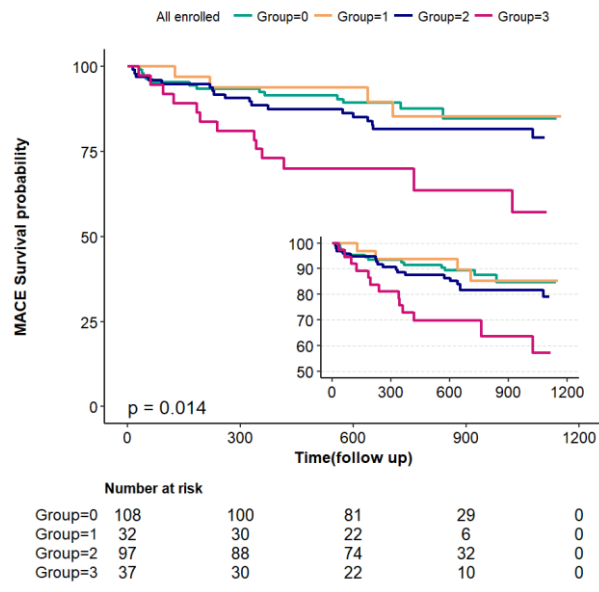

B

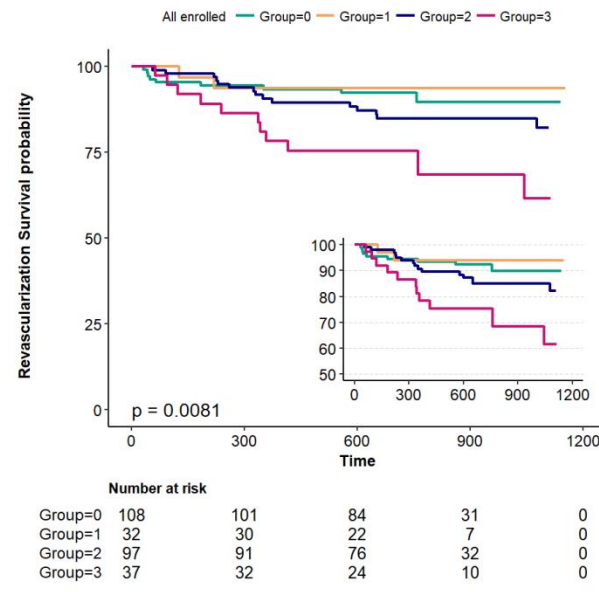

C

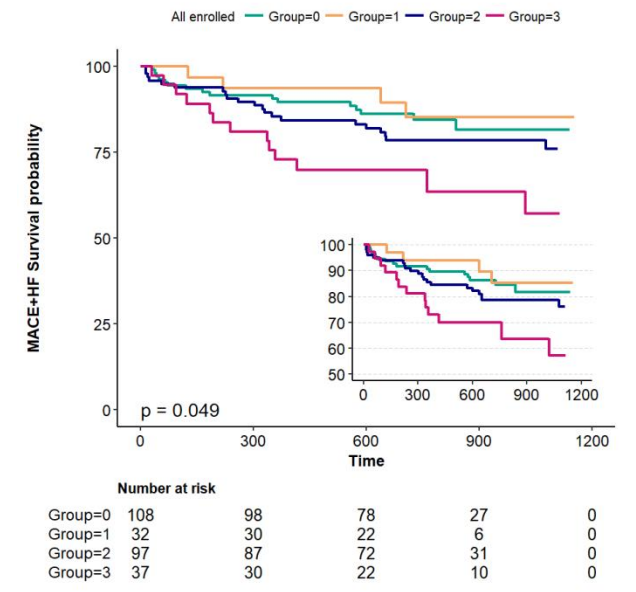

Supplement Figure 1 Kaplan-Meier curves showing cumulative different endpoints (including MACE, revascularization and composite endpoints including MACE, revascularization and heart failure) rates for up to median 1.98 years stratified by the level of rSS and TCFA characteristic among all enrolled patients.

Group=0 represent the patients with low level of rSS ( $rSS \leq 4$ ) and absence of TCFA in the culprit lesion.

Group=1 represent the patients with low level of rSS ( $rSS \leq 4$ ) and present of TCFA in the culprit lesion.

Group=2 represent the patients with high level of rSS ( $rSS > 4$ ) and absence of TCFA in the culprit lesion.

Group=3 represent the patients with high level of rSS ( $rSS > 4$ ) and present of TCFA in the culprit lesion.

A Kaplan-Meier curves showing cumulative MACE rates for up to median 1.98 years stratified by the level of rSS and TCFA characteristic among all enrolled patients.

B Kaplan-Meier curves showing cumulative revascularization rates for up to median 1.98 years stratified by the level of rSS and TCFA characteristic among all enrolled patients.

C Kaplan-Meier curves showing cumulative composite endpoints including MACE, revascularization and heart failure rates for up to median 1.98 years stratified by the level of rSS and TCFA characteristic among all enrolled patients.

A

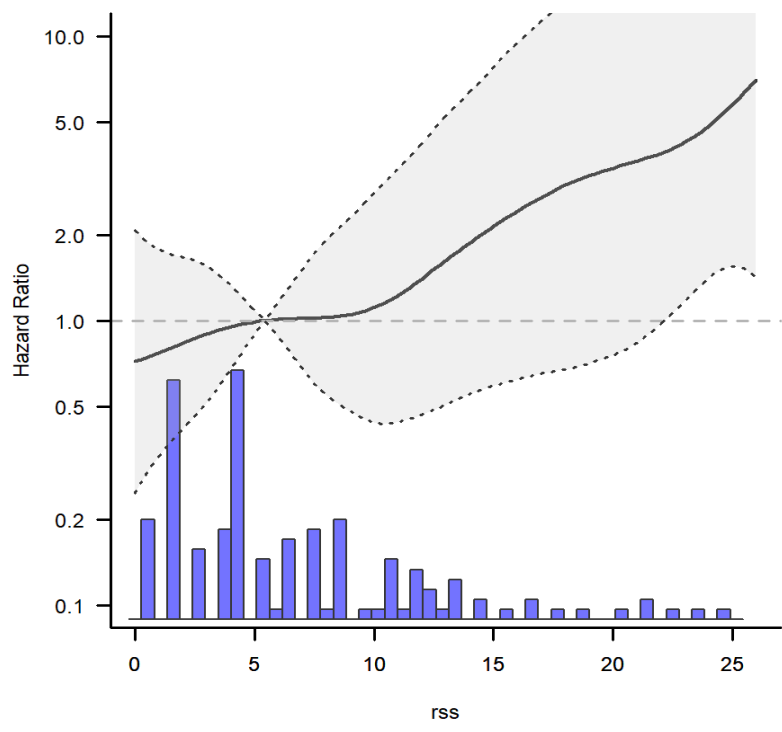

B

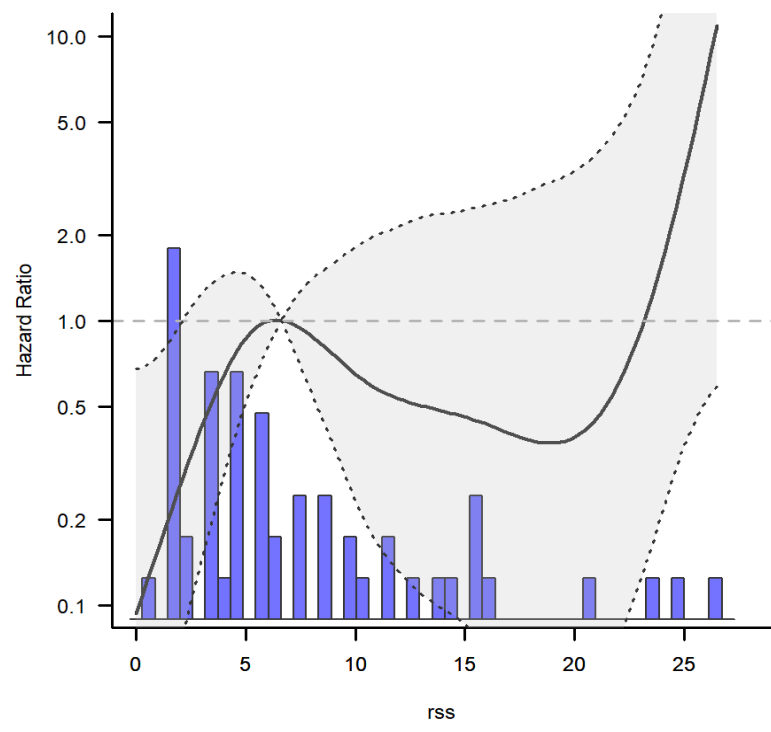

Supplement Figure 2 COX regression fitting curve

The confounding factors include smoking, hypertension, diabetes mellitus, hyperlipidemia and sex.

*rSS, residual syntax score*

While the hazard ratio was grow by the increase rSS among the patients without TCFA (A), the tendency was double swing by the increase rSS among the patients with TCFA (B).

Supplement Fig. 3 Forest plot

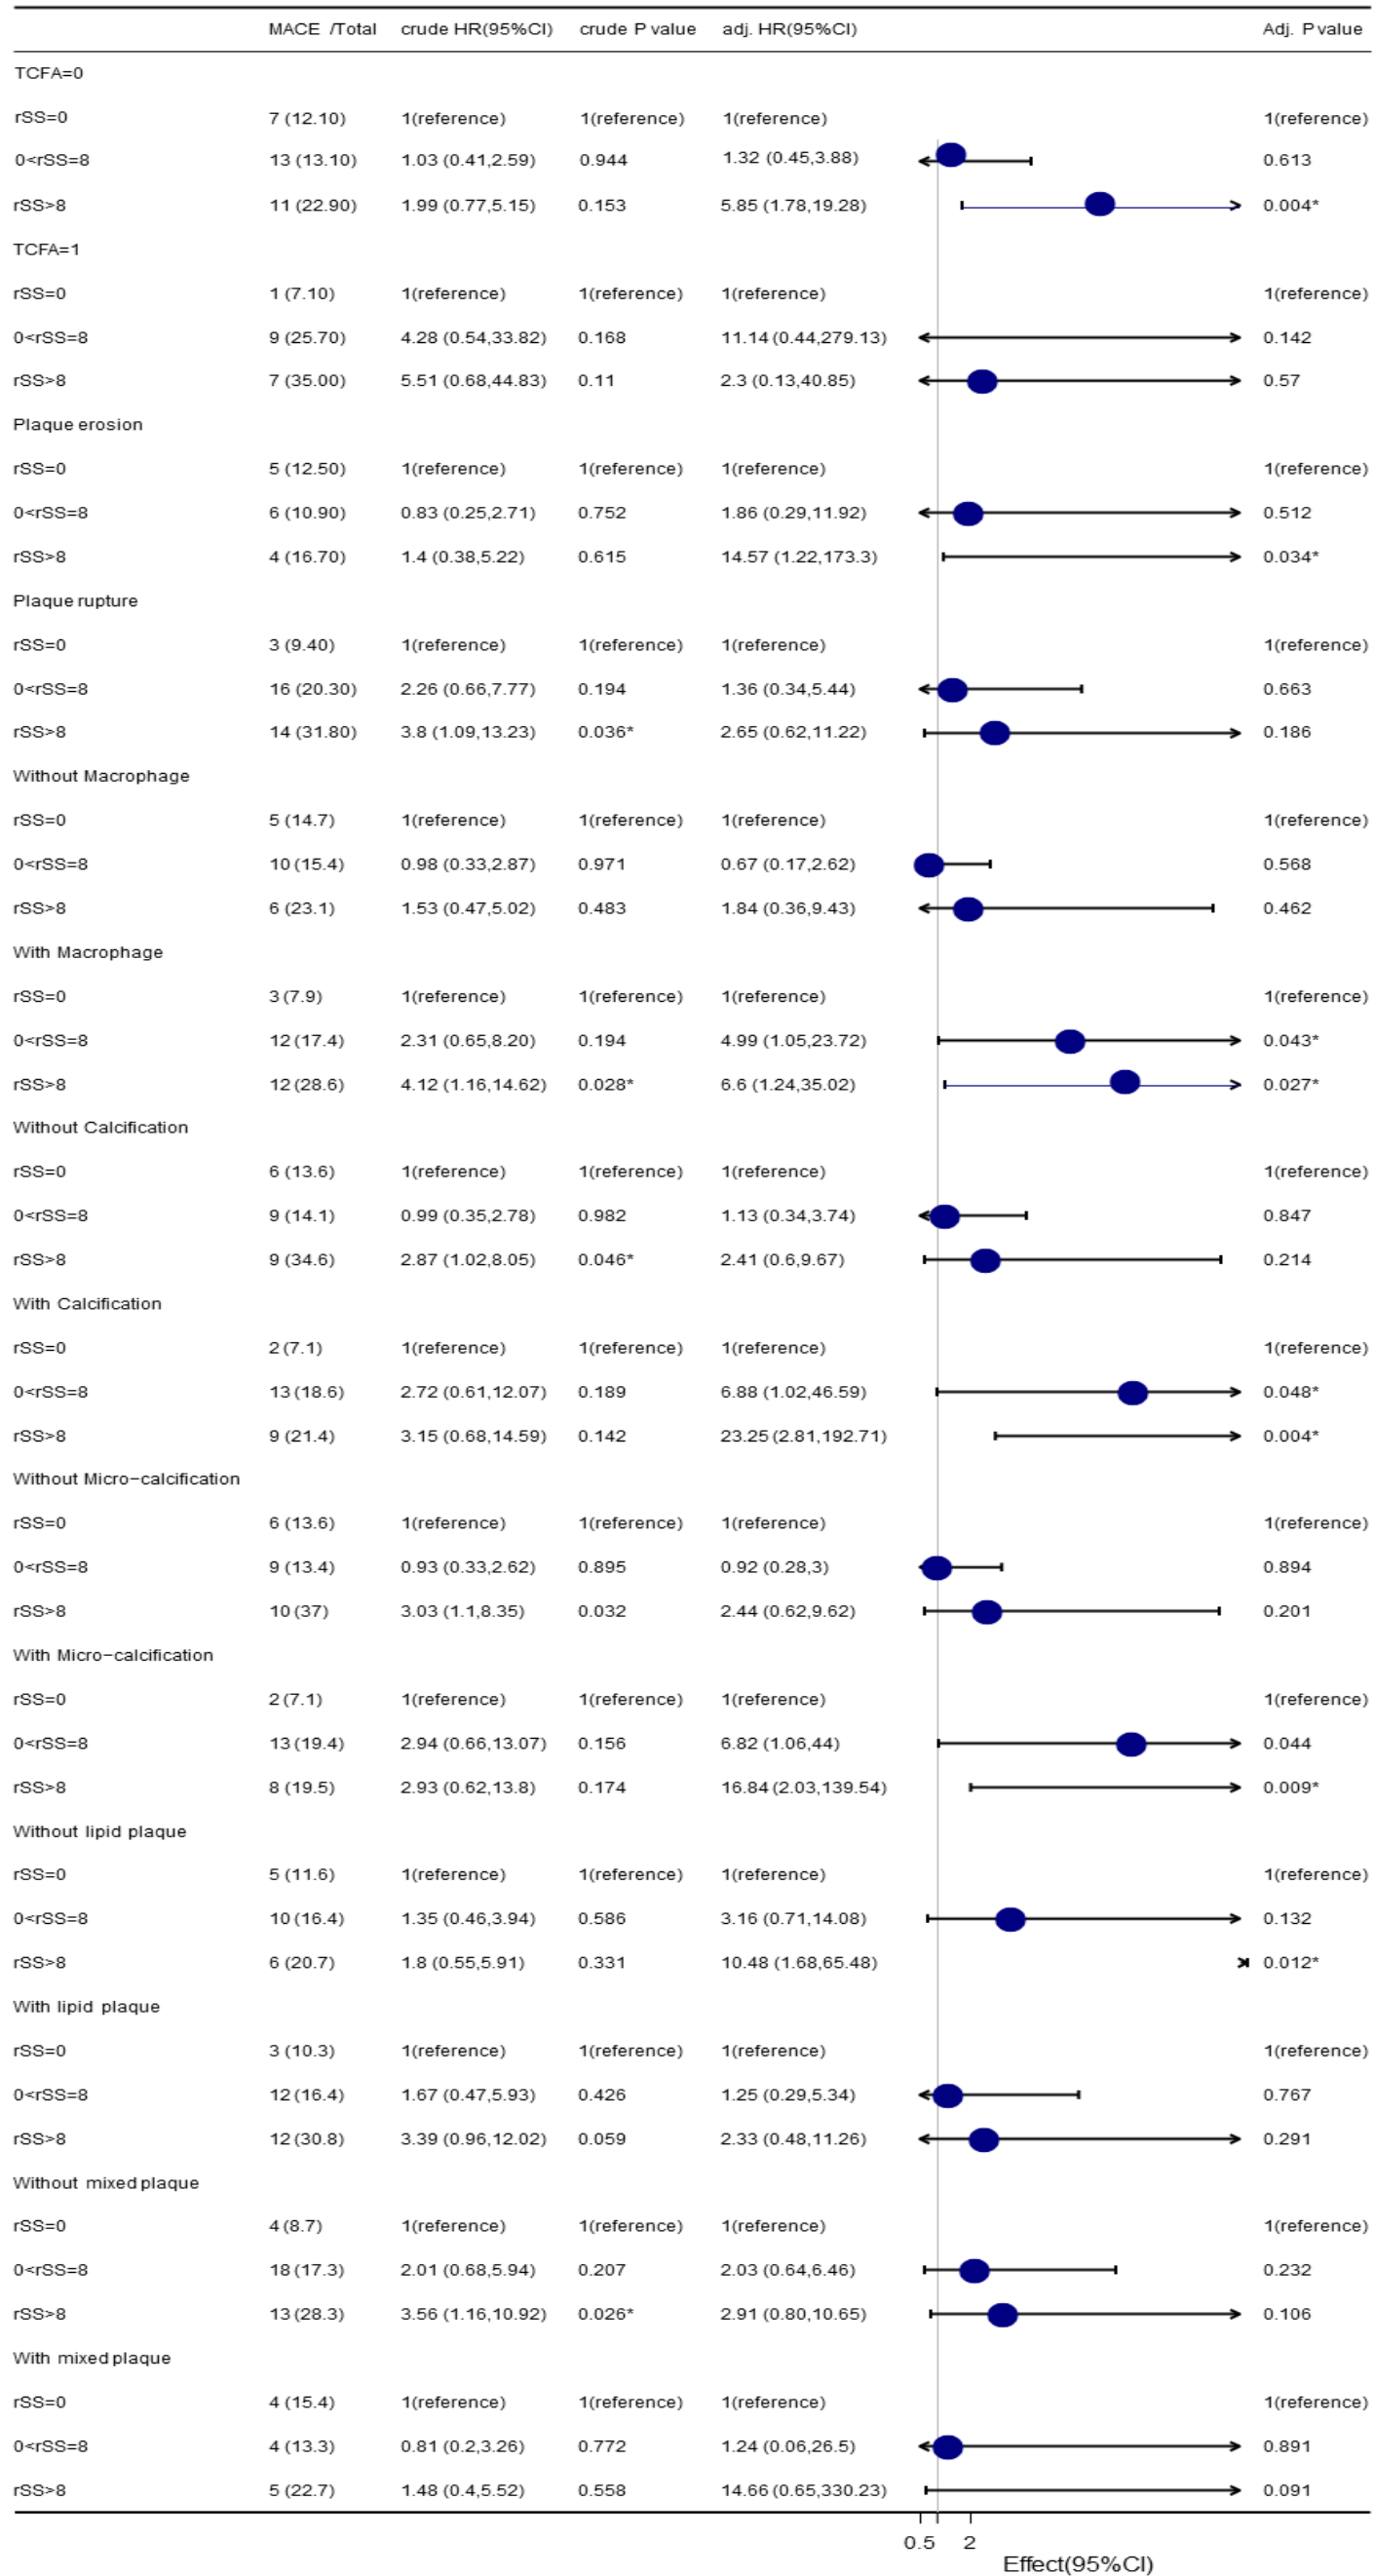

*rSS*, residual syntax score; *TCFA*, thin-cap fibroatheroma; *MACE*, major adverse coronary events; *adju.*, adjusted; *HR*, hazard ratio; *CI*, 95% confidence interval. \*  $p < 0.05$
